# Supplementary material
Source: MDPI journal article supplement (https://www.mdpi.com/2311-7524/8/1/12)
Supplement: s1 [file s1]

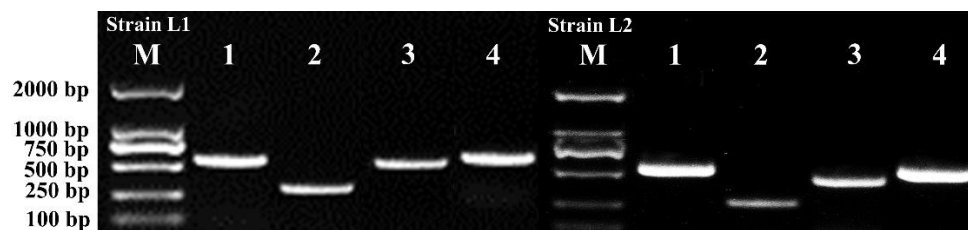

**Figure S1.** Electrophoresis result for the molecular identification of *Alternaria jacinthicola* using four fungus primer pairs. M: DL2000 marker; Lane 1: PCR products amplified using ITS1/ITS4 primer pair; Lane 2: PCR products amplified using EF1-728F/EF1-968R primer pair; Lane 3: PCR products amplified using Alt F/Alt R primer pair; Lane 4: PCR products amplified using gpd1/gpd2 primer pair.
